# Supplementary material
Source: Springer Nature journal article supplement (https://hal.science/hal-01341269v1/file/12711_2013_2666_MOESM1_ESM.pdf)

**a)**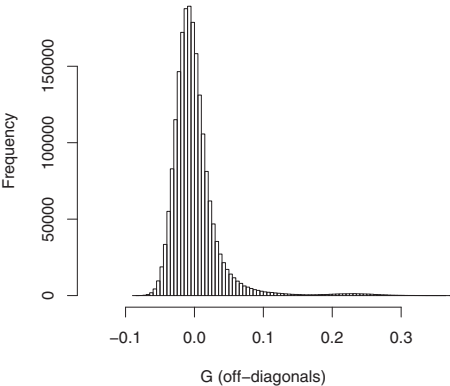**b)**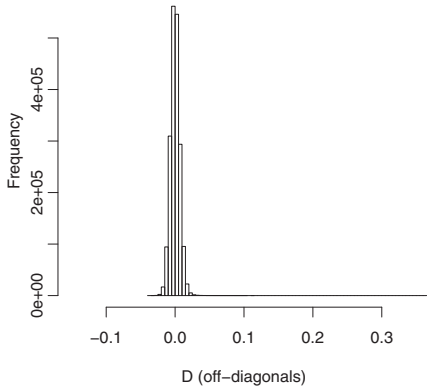

Supplement: MOESM1 [file 12711_2013_2666_MOESM1_ESM.pdf]
